1  
2  
3  
4  
5  
6  
7  
8  
9  
10  
11  
12  
13  
14  
15  
16  
17  
18  
19  
20  
21  
22

**Functional insight and cell-specific expression of the adipokinetic hormone/corazonin-related peptide in the human disease vector mosquito, *Aedes aegypti***

Salwa Afifi, Azizia Wahedi and Jean-Paul Paluzzi\*

Department of Biology, York University, 4700 Keele Street, Toronto, Ontario, M3J1P3, Canada

\* corresponding authors

Prof. Jean-Paul Paluzzi, Department of Biology, York University, 4700 Keele Street, Toronto, Ontario, M3J1P3, Canada, Email: [paluzzi@yorku.ca](mailto:paluzzi@yorku.ca)

23 **Abstract**

24  
25       The adipokinetic hormone/corazonin-related peptide (ACP) is an insect neuropeptide  
26 structurally intermediate between corazonin (CRZ) and adipokinetic hormone (AKH). Unlike the  
27 AKH and CRZ signaling systems that are widely known for their roles in the mobilization of  
28 energy substrates and stress responses, respectively, the main role of ACP and its receptor  
29 (ACPR) remains unclear in most arthropods. The current study aimed to localize the distribution  
30 of ACP in the nervous system and provide insight into its physiological roles in the disease  
31 vector mosquito, *Aedes aegypti*. Immunohistochemical analysis and fluorescence *in situ*  
32 hybridization localized the ACP peptide and transcript within a number of cells in the central  
33 nervous system, including two pairs of laterally positioned neurons in the protocerebrum of the  
34 brain and a few ventrally localized neurons within the pro- and mesothoracic regions of the fused  
35 thoracic ganglia. Further, extensive ACP-immunoreactive axonal projections with prominent  
36 blebs and varicosities were observed traversing the abdominal ganglia. Given the prominent  
37 enrichment of ACPR expression within the abdominal ganglia of adult *A. aegypti* mosquitoes as  
38 determined previously, the current results indicate that ACP may function as a neurotransmitter  
39 and/or neuromodulator facilitating communication between the brain and posterior regions of the  
40 nervous system. In an effort to elucidate a functional role for ACP signaling, biochemical  
41 measurement of energy nutrients in female mosquitoes revealed a reduction in abdominal  
42 glycogen stores in response to ACP that matched the actions of AKH, but interestingly, a  
43 corresponding hypertrehalosaemic effect was only found in response to AKH since ACP did not  
44 influence circulating carbohydrate levels. Comparatively, both ACP and AKH led to a significant  
45 increase in haemolymph carbohydrate levels in male mosquitoes while both peptides had no  
46 influence on their glycogen stores. Neither ACP nor AKH influenced circulating or stored lipid

47 levels in both male and female mosquitoes. Collectively, these results reveal ACP signaling in  
48 mosquitoes may have complex sex-specific actions, and future research should aim to expand  
49 knowledge on the role of this understudied neuropeptide.

50

51 **Keywords:**

52

53 insect; neuropeptide; interneurons; neurotransmitter; neuromodulator; energy mobilization

54

55 **Introduction**

56  
57       Neuropeptides play a crucial role in regulating numerous physiological and behavioral  
58 processes such as feeding, development, water balance, and reproduction in multicellular  
59 animals, including arthropods (Barón et al., 2010; Nässel and Winther, 2010). Three  
60 neuropeptide signaling systems present in invertebrates show homology to the mammalian  
61 gonadotropin-releasing hormone (GnRH) system (Gäde et al., 2011; Hansen et al., 2010; Li et  
62 al., 2016; Roch et al., 2011). These three neuropeptide systems include adipokinetic hormone  
63 (AKH), corazonin (CRZ) and the adipokinetic hormone/corazonin-related peptide (ACP) family.

64       AKH is one of the first insect neuropeptides to have been purified and isolated and is  
65 synthesized exclusively by neurosecretory cells (NSC) of the corpora cardiaca (CC), a small  
66 neurohaemal organ that is associated closely with the brain in insects (Diederer et al., 1987;  
67 Diederer et al., 2002; Stone et al., 1976). AKH was termed "adipokinetic" due to its primary  
68 function in regulating energy homeostasis in adult insects by mobilizing lipids and/or  
69 carbohydrates from the fat body (an organ equivalent to the vertebrate liver and adipose tissue)  
70 during high physical activities, including locomotion and flight (Gäde et al., 1997; Liu et al.,  
71 2009; Mercier et al., 2007). Additional roles of the AKHs include the regulation of oxidative  
72 stress, life span extension, heart-beat rate stimulation, and protein synthesis inhibition (Gäde and  
73 Marco, 2006; Zandawala et al., 2018).

74       Another closely related insect neuropeptide, CRZ (from corazón, which is Spanish for  
75 "heart"), also shares some structural homology with AKH but differs notably in its functions.  
76 CRZ is produced chiefly in the neuroendocrine cells of the pars lateralis of the protocerebrum  
77 and is released via the CC (Predel et al., 2007). Immunohistochemical studies in the cockroach  
78 *Periplaneta americana* (Veenstra and Davis, 1993) and fruit fly *Drosophila melanogaster* (Choi

79 et al., 2005) showed that CRZ localized to several dorsolateral neurons in the pars lateralis and  
80 also in each abdominal ganglia of the ventral nerve cord. CRZ was first discovered in the  
81 cockroach, *P. americana*, and was named because of its cardio-excitatory activity in many  
82 insects, including the kissing bug *Rhodnius prolixus* (Patel et al., 2014; Veenstra, 1989).  
83 However, CRZ lacks cardio-excitatory activity in adult *Anopheles gambiae* mosquitoes (Hillyer  
84 et al., 2012). Whether CRZ has a conserved function across insects remains unclear, although it  
85 has also been linked to the control of melanization, ecdysis as well as responses to metabolic and  
86 osmotic stress (Kim et al., 2004; Kubrak et al., 2016; Tawfik et al., 1999; Veenstra, 1989;  
87 Zandawala et al., 2021).

88 A third structurally-related signaling system was discovered in the *A. gambiae* mosquito  
89 named adipokinetic hormone/corazonin-related peptide (ACP), which is found in diverse insects  
90 and is evolutionarily related to AKH and CRZ (Hansen et al., 2010). Although ACP and its  
91 receptor (ACPR) are structurally intermediate between AKH and CRZ and their receptors, their  
92 functional role in insects is not well established. Nonetheless, studies revealed that AKH, CRZ,  
93 and ACP signaling systems function independently as their receptors show highly-selective  
94 specificity for their respective ligands (Hansen et al., 2010; Zandawala et al., 2015; Hamoudi et  
95 al., 2016; Oryan et al., 2018; Wahedi and Paluzzi, 2018). Moreover, studies utilizing  
96 comprehensive *in silico* analyses proposed that the AKH hormonal system was duplicated prior  
97 to the emergence of the phylum Arthropoda, resulting in the ACP and AKH signaling systems  
98 (Hansen et al., 2010; Hauser and Grimmelikhuijzen, 2014; Marchal et al., 2018; Zhou et al.,  
99 2018).

100 Studies in multiple insects, including the kissing bug *R. prolixus* and female mosquito *A.*  
101 *gambiae*, have shown that ACP does not regulate the mobilization of energy substrates and thus

102 does not replicate the actions of AKH (Kaufmann and Brown, 2008; Patel et al., 2014).  
103 Furthermore, ACP does not influence the heart-beat rate, indicating that the physiological actions  
104 of ACP do not overlap with a prominent function of CRZ (Hillyer et al., 2012; Patel et al., 2014).  
105 Interestingly, a precise function of ACP was found recently where it regulates haemolymph  
106 levels of carbohydrates and lipids in the male cricket, *Gryllus bimaculatus* (Zhou et al., 2018).  
107 This evidence indicated that ACP in crickets might indeed share a functional role with AKH in  
108 the regulation of energy homeostasis (Zhou et al., 2018). Moreover, an elegant study in the  
109 locust *Locusta migratoria* revealed that ACP regulates muscle lipid utilization during a long-  
110 term migratory flight (Hou et al., 2021). Contrary to the utilization of lipids as a primary energy  
111 substrate in locusts, the primary source of energy used by mosquitoes is carbohydrates in the  
112 form of trehalose, although prolonged stress will also result in lipid breakdown (Briegel et al.,  
113 2001).

114 Transcripts encoding *ACP* and its receptor (*ACPR*) were found to be enriched in the  
115 nervous system in *R. prolixus* and *Tribolium castaneum* (Hansen et al., 2010; Zandawala et al.,  
116 2015). ACP was immunolocalized to numerous neurons in each hemisphere of the brain, with  
117 projections throughout the central nervous system (CNS) in *T. castaneum* and *R. prolixus*, but  
118 notably, no projections were found exiting the CNS (Hansen et al., 2010; Patel et al., 2014). A  
119 recent study in Orthoptera revealed that the ACP immunolocalization is surprisingly different  
120 from other insect species since ACP is produced by neuroendocrine cells in both the pars  
121 intercerebralis and pars lateralis (e.g. *L. migratoria*), while in other insect species (e.g. *P.*  
122 *americana*), ACP is restricted to neurons in the pars lateralis alone (Veenstra, 2021). In adult *A.*  
123 *aegypti*, *ACP* and *ACPR* transcripts are expressed in the CNS with *ACP* transcript significantly  
124 enriched in the female brain and thoracic ganglia, while the *ACPR* transcript was significantly

125 enriched in the abdominal ganglia of both sexes (Wahedi and Paluzzi, 2018). Furthermore, the *A.*  
126 *aegypti* *ACPR* transcript was expressed in other tissues outside the nervous system, such as the  
127 carcass, which includes the fat body of male adult mosquitoes, suggesting that the ACP signaling  
128 system might also have a role in peripheral tissues (Wahedi and Paluzzi, 2018).

129         Consequently, the current study aimed to advance our understanding of the localization  
130 and specific physiological role of the ACP/ACPR signaling system in the adult disease vector  
131 mosquito, *A. aegypti*. This included mapping the distribution of the ACP peptide and transcript  
132 throughout the CNS and examining the *ACPR* transcript expression pattern within the ventral  
133 nerve cord comparing abundance in pre-terminal abdominal ganglia and the terminal ganglion,  
134 which would provide insight into potential functional roles. Lastly, energy substrates were  
135 quantified following injection with *A. aegypti* ACP (*Aedae*-ACP) to determine its effect (if any)  
136 on the mobilization of trehalose and lipid and their depletion from stores in both male and female  
137 adult *A. aegypti*.

## 138 **Materials and Methods**

### 139 **Experimental animals and rearing conditions**

140

141 *Aedes aegypti* mosquito rearing was carried out as described previously (Rocco et al.,  
142 2017; Wahedi and Paluzzi, 2018). Briefly, adults of *A. aegypti* (Liverpool strain) were obtained  
143 from an established laboratory colony in the Department of Biology, York University (Toronto,  
144 ON, Canada). Larvae of *A. aegypti* were hatched from semi-desiccated eggs oviposited onto  
145 Whatman filter papers in a plastic container filled with double-distilled water and were fed daily  
146 with several drops of a larval feed solution comprised of 2% (w/v) beef liver powder and 2%  
147 (w/v) brewer's yeast. Pupae were transferred to beakers containing distilled water. Larvae,  
148 pupae, and adult mosquitoes were reared in an incubator (26°C, 12:12 hour light: dark cycle).  
149 Adult male and female mosquitoes were supplied with a 10% sucrose solution through a cotton  
150 ball wick fitted in a microcentrifuge tube. Colony maintenance included adult females that were  
151 blood-fed using an artificial membrane feeding system every two days with sheep's blood in  
152 Alsever's solution (Cedarlane Laboratories Ltd., Burlington, ON, Canada). All experiments were  
153 carried out using one to four-day-old female and male adult mosquitoes (fed *ad libitum* with 10%  
154 sucrose) that had been isolated and transferred into mesh-covered glass jars in early pupal stage.

155

### 156 **Immunohistochemistry**

157 Male and female one and four-day-old adult *A. aegypti* were briefly anesthetized with  
158 CO<sub>2</sub>, and nervous system tissues (i.e., brain, thoracic ganglia, and abdominal ganglia) were  
159 dissected at room temperature (RT) in 1x nuclease-free Dulbecco's phosphate-buffered saline  
160 (1x DPBS) and then transferred immediately to 4% paraformaldehyde for fixation overnight at  
161 4°C. The nervous tissues were then washed three times, 15 minutes each with 1x DPBS, and the



162 tissues were then incubated at RT for one hour with 4% Triton X-100, 2% bovine serum albumin  
163 (BSA), and 10% normal sheep serum (NSS) prepared in 1x DPBS. Following this, tissues were  
164 washed several times with 1x DPBS, each wash lasting 15 minutes to remove all traces of  
165 permeabilization solution. The nervous tissues were incubated with an anti-ACP mouse  
166 polyclonal ACP antiserum (diluted 1:1000), which was a kind gift from Prof. Jan Veenstra (Patel  
167 et al., 2014; Veenstra, 2021), prepared in 1x DPBS with 0.4% Triton X-100, 2% BSA(w/v) and  
168 2% NSS(v/v) for 4 days with gentle agitation on a flatbed rocker at 4 °C. As a negative control,  
169 the control tissues were incubated under the same conditions and in the same solution [0.4%  
170 Triton X-100 containing 2% BSA (w/v) and 2% NSS (v/v) in 1x DPBS] but without adding the  
171 ACP primary antiserum. After the four-day ACP primary antiserum incubation, tissues  
172 underwent three 15-minute washes with 1x DPBS. The nervous tissues were then incubated  
173 overnight at 4°C with Alexa Fluor 594-Goat anti-mouse IgG (H+L) secondary antibody (1:200  
174 dilution; Molecular Probes, Life Technologies, Eugene, OR) made up in 1x DPBS with 10%  
175 NSS(v/v). Following overnight incubation at 4°C with gentle agitation, tissues were rinsed  
176 several times with 1x DPBS at RT and mounted on glass coverslips with mounting media [1x  
177 DPBS with 50% glycerol containing 4 µg/mL 4',6- Diamidino-2-phenylindole dihydrochloride  
178 (DAPI)] and imaged on a Nikon Eclipse Ti fluorescence microscope (Neville, NY).

179

## 180 **Preparation of Digoxigenin-labeled RNA probes**

181

182 The distribution of cells expressing the *A. aegypti* ACP mRNA within the CNS was  
183 determined using fluorescent *in situ* hybridization (FISH) following a similar protocol as  
184 previously described (Rocco and Paluzzi, 2020; Sajadi et al., 2020). To synthesize the sense and  
185 antisense probes, a 333bp fragment of the *A. aegypti* ACP transcript including the complete open

186 reading frame was amplified via PCR (see **Table S1** for primer details) using whole mixed-sex  
187 adult cDNA as a template. Primer sequences for *AedaeACP* (Genbank Accession Number:  
188 FN391984) are based on a previously published sequence (Kaufmann et al., 2009). The amplicon  
189 was ligated to pGEM-T vector (Promega, Madison, WI). The T7 promoter sequence (5'-  
190 AATTGTAATACGACTCACTATAGGGCG-3') at the 5' end of the sense strand and the 5' end  
191 of the antisense strand was added to the PCR products via directional screening and subsequent  
192 amplification of *ACP* cDNA from the pGEM-T vector using a combination of a T7 promoter  
193 sequence primer and either a gene-specific forward primer for antisense probe template or a  
194 gene-specific reverse primer for sense probe template.

195         Subsequently, digoxigenin (dig) labeled antisense and sense *ACP* probes were generated  
196 by *in vitro* transcription using the T7 RNA Polymerase Mix and 10X Reaction Buffer from the  
197 HiScribe T7 High Yield RNA Synthesis Kit (New England Biolabs, Whitby, ON) and the DIG  
198 RNA Labeling Mix, 10X conc. (Roche Applied Science, Mannheim, Germany), following the  
199 manufacturer's protocol. Once DIG-labeled RNA synthesis was complete, template DNA was  
200 removed with DNase I (New England Biolabs, Whitby, ON) and run on a non-denaturing 1%  
201 agarose gel to confirm RNA probe integrity. RNA probes were quantified by UV spectroscopy  
202 using a Take3 micro-volume plate and measured on a Synergy Multi-Mode Microplate Reader  
203 (BioTek, Winooski, VT, USA).

204

### 205 ***ACP* transcript localization using fluorescence *in situ* hybridization**

206         Four-day-old adult *A. aegypti* tissues/organs were dissected in 1x nuclease-free DPBS  
207 and immediately placed in 0.2mL PCR tubes containing fixation solution (4%  
208 paraformaldehyde) and incubated at room temperature (RT) for 60 minutes on a rocker. Tissues

209 were subsequently washed five times with 0.1% Tween-20 in DPBS (PBT) and treated with 1%  
210 H<sub>2</sub>O<sub>2</sub> (diluted in DPBS) for 10 minutes at RT to quench endogenous peroxidase activity. Tissues  
211 were then treated with 4% Triton X-100 (Sigma Aldrich, Oakville, Ontario, Canada) prepared in  
212 PBT and incubated for one hour at RT to digest the tissues. Tissues were then washed three times  
213 with PBT to stop the digestion. A secondary fixation was performed for 20 minutes in fresh  
214 fixation solution described above and then washed three times with PBT to remove all traces of  
215 fixative. Tissues were then rinsed in a 1:1 mixture of PBT-RNA hybridization solution (50%  
216 formamide, 5x SSC, 100 µg/mL heparin, 100 µg/mL sonicated salmon sperm DNA and 0.1%  
217 Tween-20), which was subsequently removed and replaced with 100% hybridization solution and  
218 tissues held at RT. Aliquots (100 µL/tube of samples) of RNA hybridization solution were boiled  
219 at 100°C for five minutes and then cooled on ice for five minutes, giving rise to the  
220 prehybridization solution. The tissues were incubated in the prehybridization solution at 56°C for  
221 60 minutes. During prehybridization, 200ng of antisense RNA probe for *ACP* (or sense RNA  
222 probe for controls) was added per 100µL of fresh hybridization solution, and this solution was  
223 heated to denature at 80°C for 3 minutes and then cooled on ice for 5 minutes. The  
224 prehybridization solution was then removed, and tissues were incubated in the hybridization  
225 solution containing a denatured probe for approximately 16 hours at 56°C in a thermocycler  
226 block.

227 The next day, tissues were washed twice with fresh hybridization solution and  
228 subsequently with 3:1, 1:1 and 1:3 (vol/vol) mixtures of hybridization solution-PBT (all pre-  
229 warmed to 56°C). The samples were then washed with PBT pre-warmed to 56°C and cooled to  
230 room temperature. To reduce non-specific staining, tissues were blocked for one hour with PBTB  
231 (1x DPBS, 0.1% Tween-20, 1% Molecular Probes block reagent; Invitrogen, Carlsbad, CA). The

232 tissues were then incubated in a solution containing PBTB and a 1:400 dilution of a mouse anti-  
233 DIG biotin-conjugated antibody (Jackson ImmunoResearch Laboratories, West Grove, PA) at RT  
234 for 1.5 hours on a rocker and protected from light. The antibody incubation was followed by  
235 several washes in PBTB over the course of 1 hour. Tissues were then incubated in a 1:100  
236 dilution of horseradish peroxidase-streptavidin solution (Molecular Probes, Life Technologies,  
237 Eugene, OR) in PBTB for 1 hour, and the tissues were washed with PBTB several times over an  
238 hour. Then, the tissues were washed twice with PBT and once with DPBS. Afterwards, a  
239 tyramide solution was prepared consisting of Alexa Fluor 568 tyramide dye (1:200) in  
240 amplification buffer containing 0.0015% H<sub>2</sub>O<sub>2</sub> (Life Technologies, Eugene, OR). After the last  
241 DPBS wash was completely removed from the tissues, the tyramide solution was added to the  
242 tissues and incubated in the dark for 1 hour on a rocker at RT. The tyramide solution was then  
243 removed, and the tissues were washed with DPBS ten times over the course of an hour. Tissues  
244 were mounted on coverslips with mounting media comprised of DPBS with 50% glycerol  
245 containing 4 µg/mL 4',6- Diamidino-2-phenylindole dihydrochloride (DAPI) and were visualized  
246 on a Nikon Eclipse Ti fluorescence microscope (Neville, NY).

247

#### 248 **Abdominal and terminal ganglia dissections, RNA extraction, cDNA synthesis and RT-** 249 **qPCR**

250 One-day-old adult *A. aegypti* male (n = 50-60) and female (n = 40-50) in each  
251 biological replicate were submerged in 1x DPBS after immobilization with brief CO<sub>2</sub> exposure.  
252 In adult mosquitoes, only six abdominal ganglia appear as a result of the fusion of the 1<sup>st</sup>  
253 abdominal ganglion to the posterior of the metathoracic ganglion, and the 7<sup>th</sup> and 8<sup>th</sup> ganglia are  
254 fused into a terminal ganglion (Brown and Cao, 2001). Thus, the abdominal ganglia (2<sup>nd</sup>-6<sup>th</sup>) and

255 the fused terminal ganglion were dissected separately and stored in DNA/RNA protection  
256 reagent (New England Biolabs, Whitby, ON). Total RNA was isolated and purified using the  
257 Monarch<sup>®</sup> Total RNA Miniprep Kit following the manufacturer's protocol and guidelines (New  
258 England Biolabs, Whitby, ON). Purified total RNA samples were quantified with a Take3 micro-  
259 volume plate and measured on a Synergy Multi-Mode Microplate Reader (BioTek, Winooski,  
260 VT, USA). To assess *ACPR* transcript levels, cDNA was synthesized using the iScript<sup>™</sup> Reverse  
261 Transcription Supermix for RT-qPCR (Bio-Rad, Mississauga, ON) following manufacturer  
262 recommendations, including a ten-fold dilution of cDNA following synthesis. The *ACPR*  
263 transcript abundance was quantified on a StepOnePlus<sup>™</sup> Real-Time PCR system (Applied  
264 Biosystems, Carlsbad, CA) using PowerUP<sup>™</sup> SYBR<sup>®</sup> Green Master Mix (Applied Biosystems,  
265 Carlsbad, CA). The conditions of thermal cycling were as follows: (1) UDG activation at 50 °C  
266 for 2 minutes, (2) 95 °C for 2 minutes, and (3) 40 cycles of (i) 15 seconds at 95 °C and (ii)  
267 1 minute at 60 °C. Gene-specific primers amplifying *AedaeACPR* mRNA sequence were  
268 described previously (Wahedi and Paluzzi, 2018). Expression levels were normalized to the  
269 geometric mean of Ribosomal protein 49 (rp49), 60S Ribosomal Protein S18 (rpl8), and 40S  
270 Ribosomal Protein L8 (rpS18) housekeeping genes that were determined previously as optimal  
271 endogenous controls (Paluzzi et al., 2014). The transcript levels were plotted relative to the  
272 abdominal ganglia. *AedaeACPR* expression profile was determined using 4-5 biological  
273 replicates each including triplicate technical replicates and no-template negative controls. Data  
274 were analyzed using a two-tailed t-test ( $p < 0.05$ ) GraphPad Prism 8.02 (GraphPad Software,  
275 San Diego, USA) following log transformation.

276

277 **Intrathoracic peptide injections and biochemical analyses**

278 To assess the influence of ACP on energy substrate levels in the adult *A. aegypti*,  
279 synthetic *Aedae*-ACP and *Aedae*-AKH (see **Table S2**, GenScript, Piscataway, NJ, USA) stocks  
280 (1mM) originally dissolved in dimethyl sulfoxide (DMSO) were diluted in 1x DPBS. A  
281 physiologically-relevant dose of 10 pmol for each peptide was injected into adult mosquitoes as  
282 this amount of *Aedae*-AKH was observed previously to elicit a hypertrehalosemic effect in adult  
283 *A. gambiae* (Kaufmann and Brown, 2008). To perform injections, a Nanoject III Programmable  
284 Nanoliter Injector (Drummond Scientific Company, Broomall, PA, USA) was fitted with fine-  
285 tipped glass needles made with a micropipette puller. Female and male one to four-day-old  
286 sugar-fed adult *A. aegypti* mosquitoes were injected with *Aedae*-ACP (or *Aedae*-AKH as a  
287 positive control) into the dorsal lateral thorax near the base of the wing. For sham-injected  
288 controls, an equivalent volume of DMSO diluted identically in 1x DPBS was injected. At 90  
289 minutes post-injection, two abdomens from females and three abdomens from males were  
290 pooled. Each mosquito was carefully opened at the segmental line between the last two  
291 abdominal segments to allow haemolymph to diffuse into the 1x DPBS. Haemolymph was  
292 collected by incubating two females or three males together for 10 min in 100  $\mu$ L 1x DPBS. A 90  
293  $\mu$ L aliquot of this diluted haemolymph solution was collected for the biochemical assay. The  
294 remaining abdomens were pooled and homogenized in 200  $\mu$ L of 2% w/v sodium sulfate  
295 solution (2% w/v NaSO<sub>4</sub>).

296 Carbohydrate, lipid, and glycogen levels were measured using a modified version of a  
297 previously published protocol (Kaufmann and Brown, 2008; Van Handel and Day, 1988). For  
298 the separation of sugar and lipids, 1.6 mL (v:v, 1:1) of chloroform/methanol (CHCl<sub>3</sub>-MeOH)  
299 was added to each centrifuge tube containing either haemolymph solution or homogenized  
300 abdomens, and tubes were centrifuged at 3000 rpm for 1 min. Next, the supernatants were

301 transferred into fresh centrifuge tubes, while the pellets were retained for glycogen analysis.  
302 Then, 600  $\mu\text{L}$  of distilled  $\text{H}_2\text{O}$  ( $\text{dH}_2\text{O}$ ) was added to the supernatant and centrifuged at 3000 rpm  
303 for 1 min. The upper portion (water/methanol, aqueous phase) was used for the sugar analysis,  
304 while the lower fraction (chloroform, organic phase) was kept for the lipid analysis. Standards  
305 ranging from 0-400  $\mu\text{g}$  for lipids in chloroform and 0-200  $\mu\text{g}$  carbohydrates in water were run  
306 alongside the samples. The glycogen in the precipitate and the standards were measured by  
307 adding 2 mL of anthrone reagent per tube immediately. For the sugar in the aqueous fraction, the  
308 tubes were heated on a heating block  $\sim 90\text{-}110^\circ\text{C}$  until the solvent evaporated down into  $\sim 0.1\text{-}$   
309  $0.2\text{ mL}$ , and 2 mL of anthrone reagent was then added per tube. Next, all tubes were heated for  
310 17 minutes at  $\sim 90\text{-}110^\circ\text{C}$  and then removed from the heating block and allowed to cool. The  
311 lipid portion of the samples and standards were placed at  $90\text{-}110^\circ\text{C}$  to evaporate the solvent, and  
312 later 200  $\mu\text{L}$  of sulfuric acid ( $\text{H}_2\text{SO}_4$ ) was added and heated for 10 minutes in the heating block.  
313 Subsequently, 1 mL of vanillin-phosphoric acid reaction was added to each tube, which was  
314 removed from the heating block and allowed to cool. A reddish color appeared within  $\sim 5$   
315 minutes, and the reaction was stable for up to 30 minutes.

316 Absorbance values for sample aliquots (100  $\mu\text{L}$ /well) from processed experimental  
317 animals and standard samples were measured in 96-well plates by a microplate reader. The  
318 optical density (OD) at  $\lambda = 625\text{ nm}$  was determined and converted to microgram per individual  
319 female or male mosquito based on the regression analysis equations derived from the standard  
320 curves. Biochemical assays were performed over 3-5 independent biological replicates, including  
321 at least three technical replicates per sample on each plate. Statistical analyses were completed  
322 using GraphPad Prism 8.02 (GraphPad Software, San Diego, USA) utilizing a one-way ANOVA  
323 and Tukey's multiple comparison post-test ( $p < 0.05$ ).

324

325



## 326 **Results**

### 327 **ACP immunoreactivity**

328 In the adult mosquito CNS, ACP immunoreactivity was localized in two pairs of lateral  
329 cells in the brain, and their axonal projections were revealed in the anterior protocerebrum (**Fig.**  
330 **1A**). Further, two immunoreactive cells were observed on the ventral side of the prothoracic  
331 segment, and one cell was faintly stained just anterior to the junction between the prothoracic  
332 segment and mesothoracic segments of the fused thoracic ganglia. Additionally, two cells were  
333 observed in the mesothoracic segment of the fused thoracic ganglia (**Fig. 1B**). Faintly staining  
334 axonal processes were observed in the thoracic ganglia that continued into the abdominal ganglia  
335 (**Fig. S1**). ACP immunoreactive processes were detected with prominent blebs and varicosities  
336 passing through each abdominal ganglia, including the terminal ganglion (**Fig. 1C, D**). A  
337 summary of ACP immunoreactivity in the CNS of adult *A. aegypti* is presented that represents  
338 multiple repetitions for each region of the nervous system (**Fig. 1E**).

339

### 340 ***A. aegypti* ACP transcript localization**

341 Assessment of cell-specific expression of *A. aegypti* ACP mRNA was accomplished  
342 using fluorescence *in situ* hybridization (FISH) with antisense probes generated for the ACP  
343 transcript (**Fig. 2**). The CNS, including the brain, thoracic ganglia, and six abdominal ganglia of  
344 the adult ventral nerve cord, were surveyed for *AedaeACP* transcript. Similar to the ACP  
345 immunolocalization pattern, wholemounts of nervous tissues from adult male and female  
346 mosquitoes revealed fluorescence signals corresponding to ACP mRNA transcript in two pairs of  
347 lateral neurosecretory cells in the anterior protocerebrum and, more specifically, the  
348 supraesophageal ganglion (**Fig. 2A**). Fluorescence signals were also observed in two to three

349 cells within the thoracic ganglia on the ventral side of the prothoracic segment just anterior to the  
350 junction between the pro- and mesothoracic segments of the ganglia (**Fig. 2B, C**). No *ACP*  
351 transcript detection was observed in the abdominal ganglia (**Fig. 2D**). No specific staining was  
352 observed in CNS tissue preparations treated with sense probes (data not shown). A schematic  
353 diagram of *ACP* transcript distribution in the CNS of adult *A. aegypti* summarizes the typical  
354 results of number and localization of *AedaeACP* transcript observed in multiple repetitions (**Fig.**  
355 **2E**).

356

### 357 ***ACPR* transcript abundance in the pre-terminal and terminal abdominal ganglion**

358 RT-qPCR was utilized to determine if *ACPR* transcript was differentially expressed in the  
359 pre-terminal abdominal (2<sup>nd</sup> to 6<sup>th</sup>) ganglia and terminal ganglion in one-day-old male and female  
360 adult *A. aegypti* mosquitoes. Notably, the expression profile of *AedaeACPR* transcript revealed  
361 no difference between the pre-terminal abdominal ganglia and the terminal ganglion in either  
362 male (**Fig. 3A**) or female (**Fig. 3B**) one-day-old adult *A. aegypti* (males,  $p = 0.9706$  and for  
363 females,  $p = 0.8641$ ).

364

### 365 **Metabolic effects of *Aedae-ACP* (and *Aedae-AKH*)**

366 As a first step towards discovering physiological roles for *ACP* in *A. aegypti*, a potential  
367 function related to energy substrate mobilization was examined. The synthetic *Aedae-ACP* and  
368 *Aedae-AKH* were separately injected into both females (**Fig. 4**) and males (**Fig. 5**), one to four-  
369 day-old adult *A. aegypti* mosquitoes and glycogen and lipid content of abdomens and lipid and  
370 carbohydrate levels in the haemolymph were determined.

371           At 90 min post-injection, haemolymph carbohydrate content in female mosquitoes was  
372 unchanged following *Aedae*-ACP injection but was significantly increased in females injected  
373 with *Aedae*-AKH ( $p < 0.0001$ ; **Fig. 4A**). For male mosquitoes, injection with both *Aedae*-ACP  
374 and *Aedae*-AKH led to significantly elevated carbohydrate levels in the haemolymph ( $p = 0.0024$   
375 and  $p = 0.0202$ , respectively) (**Fig. 5A**). Glycogen level in the abdomen was significantly  
376 reduced in both *Aedae*-ACP and *Aedae*-AKH treated female mosquitoes ( $p = 0.0279$  and  $p =$   
377  $0.0322$ , respectively) (**Fig. 4B**), whereas neither peptide influenced glycogen levels in the  
378 abdomen of male mosquitoes (**Fig. 5B**). Furthermore, no significant changes in the haemolymph  
379 and abdomen lipid levels were observed after injection with *Aedae*-ACP or *Aedae*-AKH in both  
380 female (**Fig. 4C, D**) and male mosquitoes (**Fig. 5C, D**).

381

## 382 **Discussion**

383 Relative to the well-studied AKH and CRZ neuropeptides, the adipokinetic  
384 hormone/corazonin-related peptide (ACP) and its receptor (ACPR) were more recently  
385 discovered and are now known to be widespread throughout many insects (Hansen et al., 2010).  
386 Although the ACP/ACPR signaling system demonstrates similarity to AKH and CRZ along with  
387 their cognate receptors, a functional relationship between these three signaling systems has not  
388 been determined, but instead, they appear to function independently (Hansen et al., 2010;  
389 Wahedi and Paluzzi, 2018; Zandawala et al., 2018). CRZ has many known functions, including  
390 cardio-stimulatory activity, melanization, ecdysis regulation, and stress physiology, while AKH  
391 is well established for its role in regulating energy mobilization in insects (Gäde et al., 1997;  
392 Kim et al., 2004; Kubrak et al., 2016; Veenstra, 1989; Zandawala et al., 2021; Ziegler et al.,  
393 1990). Studies of the ACP/ACPR signaling system in *A. aegypti* have revealed mRNA  
394 enrichment in nervous tissue, particularly in the brain and thoracic ganglia for *ACP* transcript  
395 (Kaufmann et al., 2009; Wahedi and Paluzzi, 2018) and in the abdominal ganglia for the *ACPR*  
396 transcript (Wahedi and Paluzzi, 2018).

397 Despite ACP and ACPR being identified in several arthropod species, unfortunately, our  
398 knowledge of their functional role in most insects remains unclear (Hansen et al., 2010; Patel et  
399 al., 2014; Zandawala et al., 2015). Therefore, this knowledge gap provides an opportunity for  
400 future investigations to better understand the specific role of this relatively understudied  
401 signaling system in insects. In the current study, the cellular localization of the ACP peptide and  
402 transcript was examined throughout the CNS of adult *A. aegypti* mosquitoes using  
403 immunohistochemistry and *in situ* hybridization. The *ACPR* transcript expression profile was  
404 determined between the pre-terminal abdominal ganglia and the terminal ganglion using RT-

405 qPCR. Lastly, the effect of ACP on energy substrate mobilization was examined in adult female  
406 and male mosquitoes.

### 407 **Distribution pattern of ACP and ACPR in the CNS**

408 Previous studies localized *Aedae*AKHs I and II to the brain, thoracic ganglia, and corpora  
409 cardiaca (CC) of *A. aegypti* and *A. gambiae* (Kaufmann et al., 2009; Kaufmann and Brown,  
410 2006). *Aedae*AKH-II was later characterized as *Aedae*-ACP (Hansen et al., 2010); therefore, the  
411 immunoreactivity in cells which was herein detected in the brain and thoracic ganglia is  
412 attributed to ACP since AKH biosynthesis and storage are confined to the CC (Bogerd et al.,  
413 1995; Diederer et al., 1987; Diederer et al., 2002; Hansen et al., 2010; Kaufmann et al., 2009a;  
414 Kaufmann and Brown, 2006; Noyes et al., 1995).

415 ACP immunoreactivity and *ACP* transcript expression were localized in two pairs of  
416 lateral neurosecretory cells in the anterior protocerebrum of the *A. aegypti* brain. Moreover, two  
417 to three cell bodies were identified in the ventral side of the prothoracic segment; two cells were  
418 also observed in the mesothoracic segment of the fused thoracic ganglia. In addition, extensive  
419 ACP-immunoreactive axonal processes with varicosities and prominent blebs were also detected  
420 passing through each abdominal ganglion. Varicosities are involved in the cell-to-cell  
421 interactions and the formation of the presynaptic terminals that induce specific changes in their  
422 functions and structures (Giachello et al., 2012). Further, several studies found that the  
423 varicosities in the sea hare *Aplysia californica* and the snail *Helix pomatia* play a role in the  
424 neurotransmitter release modulation and growing neuron remodeling (Angers et al., 2002; Bailey  
425 and Chen, 1988; Chin et al., 2002; Cibelli et al., 1996; Ghirardi et al., 2000, 1996; Giachello et  
426 al., 2012; Hatada et al., 2000). Therefore, ACP immunoreactive varicosities and blebs associated  
427 with axonal processes observed in the abdominal ganglia provide evidence of cell-to-cell

428 communication, suggesting this neuropeptide acts within the CNS as a neurotransmitter or  
429 neuromodulator in the mosquito. The current results are consistent (in part) with a previous study  
430 in the kissing bug, *R. prolixus*, where ACP immunoreactivity was detected in the brain,  
431 particularly in two bilaterally paired cell bodies located in the protocerebrum (Patel et al., 2014).  
432 Additionally, a recent study in the locust, *L. migratoria*, revealed that ACP peptide was detected  
433 in numerous cells in the bilateral forebrain and the pars intercerebralis (Hou et al., 2021).

434 Lately, a study using three orthopteran species observed that the expression of ACP is  
435 notably different from non-orthopteran insects. By examining the ACP-immunoreactivity in the  
436 adult *Schistocerca gregaria*, *G. bimaculatus*, and *L. migratoria*, many neuroendocrine cells were  
437 observed in the pars intercerebralis that projected to the CC, while a small number of the  
438 interneurons in the pars lateralis of the brain were detected (Veenstra, 2021). Unlike the  
439 distribution of ACP in the brain of Orthoptera, the results of the ACP immunoreactivity of the  
440 adult American cockroach *P. americana* brain (Veenstra, 2021) show consistency in the  
441 distribution of ACP within the adult brain of *A. aegypti* mosquitoes. Specifically, in the adult *P.*  
442 *americana*, ACP immunoreactive interneurons were expressed only in a small number of ACP  
443 interneurons in the lateral part of the brain (i.e. pars lateralis), while no ACP neuroendocrine  
444 cells in the pars intercerebralis were detected (Veenstra, 2021). Hence, based on the distribution  
445 of ACP along with the characteristics of ACP-immunoreactive staining within distinct regions of  
446 the CNS in adult *A. aegypti*, this suggests that this neuropeptide may hold a function in the  
447 coordination or communication between the anterior and posterior regions of the nervous system,  
448 suggesting a role as a neurotransmitter and/or neuromodulator.

449 Furthermore, previous studies prior to the discovery of the ACP system (Hansen et al.,  
450 2010) reported that AKH-like immunoreactivity was detected in 2 pairs of lateral neurosecretory

451 cells in the brain at the anterior region of the protocerebrum in both *A. aegypti* and *A. gambiae*  
452 (Kaufmann et al., 2009; Kaufmann and Brown, 2006). However, as was suggested later, this  
453 AKH-like immunoreactivity associated with the protocerebrum is likely to represent the cross-  
454 reactivity of ACP-producing neurons since the storage and synthesis of AKH is restricted to the  
455 CC (Diederer et al., 2002; Hansen et al., 2010; Kaufmann et al., 2009; Kaufmann and Brown,  
456 2006). Moreover, AKH-like immunoreactivity was observed within one cell in the prosegment of  
457 thoracic ganglia in ten-day-old female *A. aegypti*, while three clusters of cells in the thoracic  
458 ganglia were observed specifically within the prothoracic and mesothoracic segments of *A.*  
459 *gambiae* (Kaufmann et al., 2009; Kaufmann and Brown, 2006). ACP-like immunoreactivity was  
460 determined in three to four neurons in the brain within the anterior region of each hemisphere,  
461 and their axons project processes to the thoracic and abdominal ganglia in the flour beetle, *T.*  
462 *castaneum* (Hansen et al., 2010). ACP-like immunoreactivity wasn't detected outside of the CNS  
463 in either *R. prolixus* or *T. castaneum*, nor was it associated with neurohaemal organs (Hansen et  
464 al., 2010; Patel et al., 2014), suggesting its physiological role is constrained within the nervous  
465 system. Similarly, the results of this study also indicate that ACP-immunoreactivity is restricted  
466 within the CNS, suggesting a functional role within the mosquito nervous system.

467 In a few insect species, ACP has been detected in interneurons, and no neuroendocrine  
468 cells of the pars intercerebralis projecting to the CC were observed (Hansen et al., 2010; Patel et  
469 al., 2014). Thus, the ACP immunoreactive cells and *ACP* transcript detected in the adult *A.*  
470 *aegypti* brain appear to be interneurons signaling to the ventral nerve cord, whereas the cells in  
471 the thoracic ganglia might signal to the periphery. There are several types of interneuronal cells,  
472 such as inter-segmental ascending and descending neurons, local amacrine neurons, and wide-  
473 ranging projection neurons (Nässel and Homberg, 2006). In addition, neuropeptides in insects

474 are expressed by both interneurons and neuroendocrine cells. The interneurons have axons  
475 projecting within the CNS, and neuroendocrine cells have axons that leave the CNS and release  
476 their products, such as hormones, into the haemolymph (Veenstra, 2021). Moreover,  
477 neurosecretory cells are usually monopolar, which have axonal processes that are mostly  
478 projected directly to the peripheral tissues where their products are released. On the other hand,  
479 interneurons are generally involved in the regulation of nervous system-derived factors. As they  
480 could send their axonal processes forming synapses in different ganglia with a far-reaching  
481 neuron, or they might also act locally at a synapse within a single ganglion (Nässel and  
482 Homberg, 2006; Nation, 2002). In insects, several neuropeptides have been detected in the brain  
483 and the abdominal ganglia (Nässel, 2002). In contrast, limited studies exist on the presence of  
484 neurosecretory cells in thoracic ganglia; therefore, the nature of the cells that were observed in  
485 the *A. aegypti* thoracic ganglia remains unclear, and further investigations are required.

486         The action of ACP in the adult *A. aegypti* mosquito could be derived from either  
487 interneuron in the brain or neurosecretory cells in the thoracic ganglia (or both) and mediated via  
488 the abdominal ganglia. According to a previous study that found *ACPR* transcript enrichment in  
489 the abdominal ganglia in the adult mosquito *A. aegypti* (Wahedi and Paluzzi, 2018), this supports  
490 the notion that the abdominal ganglia might be a likely primary target of ACP action.  
491 Consequently, there is more work needed in future studies to determine the function of the ACP  
492 immunoreactive interneurons in the brain and the cells observed in the thoracic ganglia, as well  
493 as understand what triggers the activation of these neurons producing ACP. Additionally, the  
494 ACP-immunoreactive axonal processes observed might regulate or have an activity in the  
495 abdominal ganglia. This suggests that ACP might be acting as a modulator and could influence  
496 the release of other neuropeptides, including (but not limited to) crustacean cardioactive peptide,



497 kinins, CAPA, and PK1, which have been immunolocalized to adult mosquito abdominal ganglia  
498 (Chen et al., 1994; Estévez-Lao et al., 2013; Sajadi et al., 2020). Additionally, neuropeptidomic  
499 studies have revealed members of several different peptide families are present in the abdominal  
500 ganglia, including the terminal ganglion (Predel et al., 2010). Thus, further studies are required  
501 to determine downstream targets of ACP signaling in the CNS of *A. aegypti*.

## 502 **Expression pattern of *ACPR* transcript in the abdominal ganglia**

503

504 In adult mosquitoes, six distinct abdominal ganglia are present due to the fusion of the 1<sup>st</sup>  
505 abdominal ganglion to the meta-thoracic ganglion, while the 7<sup>th</sup> and 8<sup>th</sup> ganglia are fused,  
506 forming the terminal ganglion (Brown and Cao, 2001). Expression profiles of the *A. aegypti*  
507 *ACPR* transcript in the 2<sup>nd</sup>-6<sup>th</sup> abdominal ganglia and the terminal ganglion were measured to  
508 guide the functional interpretation and reveal potential roles for ACP. Examination of one-day-  
509 old *A. aegypti* male and female mosquitoes revealed no significant difference in *ACPR* transcript  
510 abundance between the abdominal ganglia (2<sup>nd</sup>-6<sup>th</sup>) and the fused terminal ganglion (7<sup>th</sup> & 8<sup>th</sup>) in  
511 both sexes. Thus, these results corroborate observations of ACP immunoreactivity with a similar  
512 distribution in the form of axonal projections in each of the abdominal ganglia. Moreover, the  
513 widespread varicosities and blebs that were revealed indicate sites of communication (i.e.  
514 synapse) within each of the ventral nerve cord ganglia. A previous report demonstrated the  
515 enrichment of the *ACPR* transcript in the abdominal ganglia while the *ACP* transcript was most  
516 abundant in the brain, followed by the thoracic ganglia (Wahedi and Paluzzi, 2018). Together,  
517 this evidence indicates ACP may hold a neuromodulator and/or neurotransmitter function in the  
518 male and female adult *A. aegypti* mosquito. However, further studies are necessary to validate  
519 this proposed role and identify the downstream targets of ACP/*ACPR* signaling in the adult *A.*  
520 *aegypti* mosquito.

521 **Metabolic actions of *Aedae*-ACP**

522

523           AKH and ACP are more closely related to each other compared to the CRZ system  
524 (Hansen et al., 2010). As a result of this closer structural similarity between AKH and ACP, we  
525 sought to determine whether the metabolic function of AKH extends to ACP in adult *A. aegypti*  
526 mosquitoes. Similar to the findings in female *A. gambiae* (Kaufmann and Brown, 2008), our  
527 results confirm that injection of synthetic AKH resulted in an increase in haemolymph  
528 carbohydrate levels and a reduction in glycogen stores in female *A. aegypti* mosquitoes. Thus, in  
529 *A. aegypti*, AKH can also be designated as a hypertrehalosaemic hormone, and like other AKHs,  
530 functions comparably to the vertebrate hormone glucagon in female adult mosquitoes. In  
531 contrast, there was no change in the haemolymph carbohydrate levels in response to ACP;  
532 however, interestingly, there was a significant reduction in the glycogen stores in females. This  
533 is in contrast to previous findings in *A. gambiae*, where ACP (then referred to as AKH-II) was  
534 found to have no effect on glycogen stores (Kaufmann and Brown, 2008). To date, no study has  
535 determined whether ACP has a metabolic action in male mosquitoes. Indeed, the current data  
536 indicate that both AKH and ACP caused a significant increase in the carbohydrate level in the  
537 haemolymph, while having no influence on the glycogen stores in male mosquitoes. In addition  
538 to enrichment in the abdominal ganglia, we identified that the *A. aegypti* *ACPR* transcript is  
539 highly expressed (over 100-fold) in the carcass, including the fat body in adult male mosquitoes  
540 but not in female mosquitoes (Wahedi and Paluzzi, 2018). This difference in the peripheral  
541 enrichment of *ACPR* could explain the observed sex-specific metabolic actions of ACP in adult  
542 *A. aegypti*. With regards to metabolic actions in relation to lipids, our data indicate there are no  
543 changes in haemolymph or abdomen lipid levels in *Aedae*-AKH or *Aedae*-ACP injected  
544 mosquitoes, irrespective of sex. This finding is not surprising since the primary metabolic fuel in

545 mosquitoes are carbohydrates in the form of trehalose, although prolonged movement or energy  
546 demand could also result in lipid breakdown (Briegel et al., 2001; Clements, 1992).

547         Several recent studies revealed that many metabolic genes and pathways contribute to sex  
548 differences (Wat et al., 2021, 2020). A study in *D. melanogaster* showed that sex-specific  
549 differences in fat storage is regulated via the AKH pathway (Wat et al., 2021). Also, a study  
550 demonstrated that the AKH receptor is involved in regulating sexual behavior and pheromone  
551 production in a sex-specific and starvation-dependent manner in *D. melanogaster* (Lebreton et  
552 al., 2016). Specifically, the AKH receptor regulates only male *D. melanogaster*, but not female,  
553 sexual behavior in a starvation-dependent manner. Males lacking AKH receptors displayed  
554 severely reduced courtship activity when starved and increased duration of mating when fed  
555 (Lebreton et al., 2016). Hence, in light of these sex-specific actions of the AKH pathway, our  
556 results suggest that the ACP signaling system may similarly have a sex-specific function in adult  
557 *A. aegypti*.

558         In the locust *L. migratoria*, ACP facilitates the utilization and oxidation of lipid during  
559 their long-term flight. Combining metabolomic and transcriptomic analyses, it was shown that  
560 ACP is involved in the oxidation and transport of fatty acids in flight muscles (Hou et al., 2021).  
561 In mosquitoes, the most abundant free amino acid is proline, which has been suggested as a  
562 possible flight metabolite in *A. aegypti* (Scaraffia and Wells, 2003). Thus, ACP may be involved  
563 in the conversion of energy substrates, as proline is a key intermediate in metabolism functioning  
564 as a transporter of acetyl units from the fat body to the flight muscle, where they re-enter the  
565 citric acid cycle and are oxidized to produce ATP (Scaraffia and Wells, 2003; Weeda et al.,  
566 1980). Further, several studies have implicated overlap between the biological actions of CRZ  
567 and AKH in nutritional and oxidative stress (Bednářová et al., 2015; Bharucha et al., 2008;

568 Kubrak et al., 2016; Zandawala et al., 2021). Thus, it is possible that ACP might share a stress-  
569 related role in insects.

570 In conclusion, this study provides evidence for the distribution of ACP within the CNS of  
571 the adult *A. aegypti* mosquito. ACP was immunolocalized within neurons in the brain and  
572 thoracic ganglia, with axonal processes projecting into the abdominal ganglia but no evidence of  
573 processes leaving the nervous system, suggesting ACP may function as a neurotransmitter or  
574 neuromodulator. *ACPR* transcript quantification in the ventral nerve cord revealed no significant  
575 difference in expression between the pre-terminal abdominal ganglia and the terminal ganglion  
576 in both sexes. ACP led to a reduction in glycogen stores in the female adult *A. aegypti*, while an  
577 increase in the carbohydrate haemolymph level was identified in male *A. aegypti* in response to  
578 ACP injection. Notably, no changes to the abdomen and haemolymph lipid levels were observed  
579 in both sexes. Together, this study provides insight to enhance our mechanistic understanding of  
580 the broad and crucial functions of the ACP signaling system in the yellow fever disease vector  
581 mosquito *A. aegypti*, which may guide novel approaches aimed at improving existing pest  
582 control strategies to reduce the burden of these medically important disease vectors.

583

#### 584 **Acknowledgments**

585 This research was supported by an NSERC Discovery Grant to J.P.P. The authors are grateful to  
586 Dr. Jan Veenstra (University of Bordeaux) for his generous gift of the mouse polyclonal ACP  
587 antiserum used in this study.

588

589 **Figure captions**

590 **Figure 1. Immunolocalization of *Aedae*ACP in the nervous system of adult *A. aegypti*.** ACP  
591 immunoreactivity (arrowheads) in two pairs of lateral interneurons in the brain (**A**), a few faintly  
592 stained cells in the fused thoracic ganglia (**B**), and extensive immunoreactive processes in all  
593 abdominal ganglia (**C**), including the terminal abdominal ganglion (**D**). Schematic overview  
594 illustrating the distribution of ACP immunoreactive staining in the CNS of adult *A. aegypti* (**E**).  
595 Scale bars A and B 100  $\mu\text{m}$ , C and D 50  $\mu\text{m}$ . Abbreviations: (PL) pars lateralis, (PI) pars  
596 intercerebralis, (SEG) subesophageal ganglion, and (OL) optic lobe. Filled cells ( $\bullet$ ) represent a  
597 100% detection frequency, while the unfilled cells (o) indicate inconsistent detection frequency.

598

599 **Figure 2. Distribution of ACP mRNA transcript in nervous tissue of adult *A. aegypti*.** ACP  
600 transcript (indicated by white arrowheads) was observed in two pairs of lateral neurosecretory  
601 cells in the brain (**A**) and two to three cells in the thoracic ganglia (**B**, **C**). No fluorescence was  
602 observed in the abdominal ganglia (**D**). Scale bars A-C, 100  $\mu\text{m}$ , D 50  $\mu\text{m}$ .

603

604 **Figure 3. Transcript expression pattern of *ACPR* in abdominal and terminal ganglia of**  
605 **one-day-old adult *A. aegypti*.** *ACPR* transcript abundance in (**A**) male and (**B**) female pre-  
606 terminal abdominal ganglia and terminal ganglion. Abbreviations: (AG) pre-terminal abdominal  
607 ganglia, (TG) terminal abdominal ganglion. Data represent mean  $\pm$  standard error of an  
608 average of 4-5 independent biological replicates, which was statistically analyzed using an  
609 unpaired two-tailed t-test following log transformation. The mosquito images were created using  
610 BioRender ([BioRender.com](https://BioRender.com)).

611

612 **Figure 4. Effects of ACP and AKH on carbohydrate, glycogen, and lipid mobilization in**  
613 **sugar-fed female adult *A. aegypti*.** (A) Carbohydrate in the haemolymph and (B) glycogen  
614 levels in the abdomen. (C) Lipid levels in the haemolymph and (D) lipid levels in the abdomen.  
615 Different letters denote bars that are significantly different from one another as determined by a  
616 one-way ANOVA and Tukey's multiple comparison post-test ( $p < 0.05$ ). Data represent the  
617 mean  $\pm$  standard error of an average of 4-5 independent biological replicates.

618

619 **Figure 5. Effects of ACP and AKH on carbohydrate, glycogen, and lipid mobilization in**  
620 **sugar-fed male adult *A. aegypti*.** (A) Carbohydrate in the haemolymph and (B) glycogen levels  
621 in the abdomen. (C) Lipid levels in the haemolymph and (D) lipid levels in the abdomen.  
622 Different letters denote bars that are significantly different from one another as analyzed by a  
623 one-way ANOVA and Tukey's multiple comparison post-test ( $p < 0.05$ ). Data represent the  
624 mean  $\pm$  standard error of an average of 4-5 independent biological replicates.

625

626

## 627 **References**

- 628 Angers, A., Fioravante, D., Chin, J., Cleary, L.J., Bean, A.J., Byrne, J.H., 2002. Serotonin  
629 stimulates phosphorylation of *Aplysia* synapsin and alters its subcellular distribution in  
630 sensory neurons. *J. Neurosci.* 22, 5412–5422. [https://doi.org/10.1523/JNEUROSCI.22-](https://doi.org/10.1523/JNEUROSCI.22-13-05412.2002)  
631 [13-05412.2002](https://doi.org/10.1523/JNEUROSCI.22-13-05412.2002)
- 632 Bailey, C.H., Chen, M., 1988. Long-term memory in *Aplysia* modulates the total number of  
633 varicosities of single identified sensory neurons. *Proc. Natl. Acad. Sci. U S A* 85, 2373–  
634 2377. <https://doi.org/10.1073/pnas.85.7.2373>
- 635 Barón, O.L., Ursic-Bedoya, R.J., Lowenberger, C.A., Ocampo, C.B., 2010. Differential gene  
636 expression from midguts of refractory and susceptible lines of the mosquito, *Aedes*  
637 *aegypti*, infected with Dengue-2 virus. *J. Insect Sci.* 10, 41.  
638 <https://doi.org/10.1673/031.010.4101>
- 639 Bednářová, A., Kodrík, D., Krishnan, N., 2015. Knockdown of adipokinetic hormone synthesis  
640 increases susceptibility to oxidative stress in *Drosophila* — A role for dFoxO? *Comp.*  
641 *Biochem. Physiol. C. Toxicol. Pharmacol.* 171, 8–14.  
642 <https://doi.org/10.1016/j.cbpc.2015.03.006>
- 643 Bharucha, K.N., Tarr, P., Zipursky, S.L., 2008. A glucagon-like endocrine pathway in  
644 *Drosophila* modulates both lipid and carbohydrate homeostasis. *J. Exp. Biol.* 211, 3103–  
645 10. <https://doi.org/10.1242/jeb.016451>
- 646 Bogerd, J., Kooiman, F.P., Pijnenburg, M.A.P., Hekking, L.H.P., Oudejans, R.C.H.M., van der  
647 Horst, D.J., 1995. Molecular cloning of three distinct cDNAs, each encoding a different  
648 adipokinetic hormone precursor, of the migratory locust, *Locusta migratoria*. *J. Biol.*  
649 *Chem.* 270, 23038–23043.
- 650 Briegel, H., Knüsel, I., Timmermann, S.E., 2001. *Aedes aegypti*: size, reserves, survival, and  
651 flight potential. *J. Vector Ecol.* 26, 21–31.
- 652 Brown, M.R., Cao, C., 2001. Distribution of ovary ecdysteroidogenic hormone I in the nervous  
653 system and gut of mosquitoes. *J. Insect Sci.* 1, 3. [https://doi.org/10.1672/1536-](https://doi.org/10.1672/1536-2442(2001)001%5b0001:doehi%5d2.0.co;2)  
654 [2442\(2001\)001%5b0001:doehi%5d2.0.co;2](https://doi.org/10.1672/1536-2442(2001)001%5b0001:doehi%5d2.0.co;2)
- 655 Chen, Y., Veenstra, J.A., Davis, N.T., Hagedorn, H.H., 1994. A comparative study of  
656 leucokinin-immunoreactive neurons in insects. *Cell Tissue Res.* 276, 69–83.  
657 <https://doi.org/10.1007/BF00354786>
- 658 Chin, J., Angers, A., Cleary, L.J., Eskin, A., Byrne, J.H., 2002. Transforming growth factor  $\beta$ 1  
659 alters synapsin distribution and modulates synaptic depression in *Aplysia*. *J. Neurosci.* 22,  
660 RC220–RC220. <https://doi.org/10.1523/JNEUROSCI.22-09-j0004.2002>
- 661 Choi, Y.J., Lee, G., Hall, J.C., Park, J.H., 2005. Comparative analysis of Corazonin-encoding  
662 genes (*Crz*'s) in *Drosophila* species and functional insights into *Crz*-expressing neurons.  
663 *J. Comp. Neurol.* <https://doi.org/10.1002/cne.20419>
- 664 Cibelli, G., Ghirardi, M., Onofri, F., Casadio, A., Benfenati, F., Montarolo, P.G., Vitiello, F.,  
665 1996. Synapsin-like molecules in *Aplysia punctata* and *Helix pomatia*: identification and  
666 distribution in the nervous system and during the formation of synaptic contacts *in vitro*.  
667 *Eur. J. Neurosci.* 8, 2530–2543. <https://doi.org/10.1111/j.1460-9568.1996.tb01547.x>
- 668 Clements, A.N., 1992. The biology of mosquitoes: Development, nutrition and reproduction.  
669 CABI.
- 670 Diederer, J.H.B., Maas, H.A., Pel, H.J., Schooneveld, H., Jansen, W.F., Vullings, H.G.B., 1987.  
671 Co-localization of the adipokinetic hormones I and II in the same glandular cells and in



- 672 the same secretory granules of corpus cardiacum of *Locusta migratoria* and *Schistocerca*  
673 *gregaria* - An immuno-electron-microscopic study. Cell Tissue Res.  
674 <https://doi.org/10.1007/BF00215522>
- 675 Diederer, J. H B, Oudejans, R.C.H.M., Harthoorn, L.F., Van Der Horst, D.J., 2002. Cell biology  
676 of the adipokinetic hormone-producing neurosecretory cells in the locust corpus  
677 cardiacum. Microsc. Res. Tech. 56, 227–236. <https://doi.org/10.1002/jemt.10026>
- 678 Estévez-Lao, T.Y., Boyce, D.S., Honegger, H.-W., Hillyer, J.F., 2013. Cardioacceleratory  
679 function of the neurohormone CCAP in the mosquito *Anopheles gambiae*. J. Exp. Biol.  
680 216, 601–613. <https://doi.org/10.1242/jeb.077164>
- 681 Gäde, G., Hoffmann, K.H., Spring, J.H., 1997. Hormonal regulation in insects: facts, gaps, and  
682 future directions. Physiol. Rev. 77, 963–1032.  
683 <https://doi.org/10.1152/physrev.1997.77.4.963>
- 684 Gäde, G., Marco, H.G., 2006. Structure, function and mode of action of select arthropod  
685 neuropeptides, in: Atta-ur-Rahman (Ed.), Stud. Nat. Prod. Chem. Elsevier, pp. 69–139.  
686 [https://doi.org/10.1016/S1572-5995\(06\)80026-8](https://doi.org/10.1016/S1572-5995(06)80026-8)
- 687 Gäde, G., Šimek, P., Marco, H.G., 2011. An invertebrate [hydroxyproline]-modified  
688 neuropeptide: Further evidence for a close evolutionary relationship between insect  
689 adipokinetic hormone and mammalian gonadotropin hormone family. Biochem. Biophys.  
690 Res. Commun. 414, 592–597. <https://doi.org/10.1016/j.bbrc.2011.09.127>
- 691 Ghirardi, M., Casadio, A., Naretto, G., Levi, R., Montarolo, P.G., 2000. Influence of the target  
692 on distribution and functioning of the varicosities of *Helix pomatia* metacerebral cell C1  
693 in dissociated cell culture. Neuroscience 96, 843–853. [https://doi.org/10.1016/s0306-4522\(00\)00015-4](https://doi.org/10.1016/s0306-4522(00)00015-4)
- 694 Ghirardi, M., Casadio, A., Santarelli, L., Montarolo, P.G., 1996. *Aplysia* hemolymph promotes  
695 neurite outgrowth and synaptogenesis of identified *Helix* neurons in cell culture. Invert.  
696 Neurosci. 2, 41–49. <https://doi.org/10.1007/BF02336659>
- 697 Giachello, C.N.G., Montarolo, P.G., Ghirardi, M., 2012. Synaptic functions of invertebrate  
698 varicosities: What molecular mechanisms lie beneath. Neural Plast. 2012, 670821.  
699 <https://doi.org/10.1155/2012/670821>
- 700 Hamoudi, Z., Lange, A.B., Orchard, I., 2016. Identification and characterization of the corazonin  
701 receptor and possible physiological roles of the corazonin-signaling pathway in *Rhodnius*  
702 *prolixus*. Front. Neurosci. 10, 357. <https://doi.org/10.3389/fnins.2016.00357>
- 703 Hansen, K.K., Stafflinger, E., Schneider, M., Hauser, F., Cazzamali, G., Williamson, M.,  
704 Kollmann, M., Schachtner, J., Grimmelikhuijzen, C.J.P., 2010. Discovery of a novel  
705 insect neuropeptide signaling system closely related to the insect adipokinetic hormone  
706 and corazonin hormonal systems. J. Biol. Chem. 285, 10736–10747.  
707 <https://doi.org/10.1074/jbc.M109.045369>
- 708 Hatada, Y., Wu, F., Sun, Z.Y., Schacher, S., Goldberg, D.J., 2000. Presynaptic morphological  
709 changes associated with long-term synaptic facilitation are triggered by actin  
710 polymerization at preexisting varicosities. J. Neurosci. 20, RC82.
- 711 Hauser, F., Grimmelikhuijzen, C.J.P., 2014. Evolution of the AKH/corazonin/ACP/GnRH  
712 receptor superfamily and their ligands in the Protostomia. Gen. Comp. Endocrinol. 209,  
713 35–49. <https://doi.org/10.1016/j.ygcen.2014.07.009>
- 714 Hillyer, J.F., Estévez-Lao, T.Y., Funkhouser, L.J., Aluoch, V.A., 2012. *Anopheles gambiae*  
715 corazonin: Gene structure, expression and effect on mosquito heart physiology. Insect  
716 Mol. Biol. 21, 343–355. <https://doi.org/10.1111/j.1365-2583.2012.01140.x>
- 717



- 718 Hou, L., Guo, S., Wang, Y., Nie, X., Yang, P., Ding, D., Li, B., Kang, L., Wang, X., 2021.  
719 Neuropeptide ACP facilitates lipid oxidation and utilization during long-term flight in  
720 locusts. *eLife* 10, e65279. <https://doi.org/10.7554/eLife.65279>
- 721 Kaufmann, C., Brown, M.R., 2008. Regulation of carbohydrate metabolism and flight  
722 performance by a hypertrehalosaemic hormone in the mosquito *Anopheles gambiae*. *J.*  
723 *Insect Physiol.* 54, 367–377. <https://doi.org/10.1016/j.jinsphys.2007.10.007>
- 724 Kaufmann, C., Brown, M.R., 2006. Adipokinetic hormones in the African malaria mosquito,  
725 *Anopheles gambiae*: identification and expression of genes for two peptides and a  
726 putative receptor. *Insect Biochem. Mol. Biol.* 36, 466–481.  
727 <https://doi.org/10.1016/j.ibmb.2006.03.009>
- 728 Kaufmann, C., Merzendorfer, H., Gäde, G., 2009. The adipokinetic hormone system in Culicinae  
729 (Diptera: Culicidae): Molecular identification and characterization of two adipokinetic  
730 hormone (AKH) precursors from *Aedes aegypti* and *Culex pipiens* and two putative AKH  
731 receptor variants from *A. aegypti*. *Insect Biochem. Mol. Biol.* 39, 770–781.  
732 <https://doi.org/10.1016/j.ibmb.2009.09.002>
- 733 Kim, Y.-J., Spalovská-Valachová, I., Cho, K.-H., Zitnanova, I., Park, Y., Adams, M.E., Zitnan,  
734 D., 2004. Corazonin receptor signaling in ecdysis initiation. *Proc. Natl. Acad. Sci. U S A*  
735 101, 6704–6709. <https://doi.org/10.1073/pnas.0305291101>
- 736 Kubrak, O.I., Lushchak, O.V., Zandawala, M., Nässel, D.R., 2016. Systemic corazonin  
737 signalling modulates stress responses and metabolism in *Drosophila*. *Open Biol.* 6,  
738 160152. <https://doi.org/10.1098/rsob.160152>
- 739 Lebreton, S., Mansourian, S., Bigarreau, J., Dekker, T., 2016. The adipokinetic hormone receptor  
740 modulates sexual behavior, pheromone perception and pheromone production in a sex-  
741 specific and starvation-dependent manner in *Drosophila melanogaster*. *Front. Ecol. Evol.*  
742 <https://doi.org/10.3389/fevo.2015.00151>
- 743 Li, S., Hauser, F., Skadborg, S.K., Nielsen, S.V., Kirketerp-Møller, N., Grimmelikhuijzen,  
744 C.J.P., 2016. Adipokinetic hormones and their G protein-coupled receptors emerged in  
745 Lophotrochozoa. *Sci. Rep.* 6, 32789. <https://doi.org/10.1038/srep32789>
- 746 Liu, Y., Liu, H., Liu, S., Wang, S., Jiang, R.-J., Li, S., 2009. Hormonal and nutritional regulation  
747 of insect fat body development and function. *Arch. Insect Biochem. Physiol.* 71, 16–30.  
748 <https://doi.org/10.1002/arch.20290>
- 749 Marchal, E., Schellens, S., Monjon, E., Bruyninckx, E., Marco, H.G., Gäde, G., Vanden Broeck,  
750 J., Verlinden, H., 2018. Analysis of peptide ligand specificity of different insect  
751 adipokinetic hormone receptors. *Int. J. Mol. Sci.* 19, 542.  
752 <https://doi.org/10.3390/ijms19020542>
- 753 Mercier, J., Doucet, D., Retnakaran, A., 2007. Molecular physiology of crustacean and insect  
754 neuropeptides. *Pestic. Sci.* 32, 345–359. <https://doi.org/10.1584/jpestics.R07-04>
- 755 Nässel, D.R., 2002. Neuropeptides in the nervous system of *Drosophila* and other insects:  
756 multiple roles as neuromodulators and neurohormones. *Prog. Neurobiol.* 68, 1–84.  
757 [https://doi.org/10.1016/s0301-0082\(02\)00057-6](https://doi.org/10.1016/s0301-0082(02)00057-6)
- 758 Nässel, D.R., Homberg, U., 2006. Neuropeptides in interneurons of the insect brain. *Cell Tissue*  
759 *Res.* <https://doi.org/10.1007/s00441-006-0210-8>
- 760 Nässel, D.R., Winther, Å.M.E., 2010. *Drosophila* neuropeptides in regulation of physiology and  
761 behavior. *Prog. Neurobiol.* 92, 42–104. <https://doi.org/10.1016/j.pneurobio.2010.04.010>
- 762 Nation, J.L., 2002. *Insect physiology and biochemistry*. CRC Press, Taylor & Francis LLC.

- 763 Noyes, B.E., Katz, F.N., Schaffer, M.H., 1995. Identification and expression of the *Drosophila*  
764 adipokinetic hormone gene. *Mol. Cell. Endocrinol.* 109, 133–141.  
765 [https://doi.org/10.1016/0303-7207\(95\)03492-P](https://doi.org/10.1016/0303-7207(95)03492-P)
- 766 Oryan, A., Wahedi, A., Paluzzi, J.-P.V., 2018. Functional characterization and quantitative  
767 expression analysis of two GnRH-related peptide receptors in the mosquito, *Aedes*  
768 *aegypti*. *Biochem. Biophys. Res. Commun.* 497, 550–557.  
769 <https://doi.org/10.1016/j.bbrc.2018.02.088>
- 770 Paluzzi, J.-P., Vanderveken, M., O'Donnell, M.J., 2014. The heterodimeric glycoprotein  
771 hormone, *gpa2/gpb5*, regulates ion transport across the hindgut of the adult mosquito,  
772 *Aedes aegypti*. *PLoS One* 9, e86386. <https://doi.org/10.1371/journal.pone.0086386>
- 773 Patel, H., Orchard, I., Veenstra, J.A., Lange, A.B., 2014. The distribution and physiological  
774 effects of three evolutionarily and sequence-related neuropeptides in *Rhodnius prolixus*:  
775 Adipokinetic hormone, corazonin and adipokinetic hormone/corazonin-related peptide.  
776 *Gen. Comp. Endocrinol.* 195, 1–8. <https://doi.org/10.1016/j.ygcen.2013.10.012>
- 777 Predel, R., Neupert, S., Garczynski, S.F., Crim, J.W., Brown, M.R., Russell, W.K., Kahnt, J.,  
778 Russell, D.H., Nachman, R.J., 2010. Neuropeptidomics of the mosquito *Aedes aegypti*. *J.*  
779 *Proteome Res.* 9, 2006–2015. <https://doi.org/10.1021/pr901187p>
- 780 Predel, R., Neupert, S., Russell, W.K., Scheibner, O., Nachman, R.J., 2007. Corazonin in insects.  
781 *Peptides* 28, 3–10. <https://doi.org/10.1016/j.peptides.2006.10.011>
- 782 Rocco, D.A., Kim, D.H., Paluzzi, J.-P.V., 2017. Immunohistochemical mapping and transcript  
783 expression of the GPA2/GPB5 receptor in tissues of the adult mosquito, *Aedes aegypti*.  
784 *Cell Tissue Res.* 369, 313–330. <https://doi.org/10.1007/s00441-017-2610-3>
- 785 Rocco, D.A., Paluzzi, J.-P.V., 2020. Expression profiling, downstream signaling, and inter-  
786 subunit interactions of *gpa2/gpb5* in the adult mosquito *Aedes aegypti*. *Front. Endocrinol.*  
787 11. <https://doi.org/10.3389/fendo.2020.00158>
- 788 Roch, G.J., Busby, E.R., Sherwood, N.M., 2011. Evolution of GnRH: diving deeper. *Gen. Comp.*  
789 *Endocrinol.* 171, 1–16. <https://doi.org/10.1016/j.ygcen.2010.12.014>
- 790 Sajadi, F., Uyklu, A., Paputsis, C., Lajevardi, A., Wahedi, A., Ber, L.T., Matei, A., Paluzzi, J.-  
791 P.V., 2020. CAPA neuropeptides and their receptor form an anti-diuretic hormone  
792 signaling system in the human disease vector, *Aedes aegypti*. *Sci. Rep.* 10, 1755.  
793 <https://doi.org/10.1038/s41598-020-58731-y>
- 794 Scaraffia, P.Y., Wells, M.A., 2003. Proline can be utilized as an energy substrate during flight of  
795 *Aedes aegypti* females. *J. Insect Physiol.* [https://doi.org/10.1016/S0022-1910\(03\)00031-](https://doi.org/10.1016/S0022-1910(03)00031-3)  
796 3
- 797 Stone, J.V., Mordue, W., Batley, K.E., Morris, H.R., 1976. Structure of locust adipokinetic  
798 hormone, a neurohormone that regulates lipid utilisation during flight. *Nature* 263, 207–  
799 211. <https://doi.org/10.1038/263207a0>
- 800 Tawfik, a I., Tanaka, S., De Loof, a, Schoofs, L., Baggerman, G., Waelkens, E., Derua, R.,  
801 Milner, Y., Yerushalmi, Y., Pener, M.P., 1999. Identification of the gregarization-  
802 associated dark-pigmentotropin in locusts through an albino mutant. *Proc. Natl. Acad.*  
803 *Sci. U S A.* 96, 7083–7087. <https://doi.org/10.1073/pnas.96.12.7083>
- 804 Van Handel, E., Day, J.F., 1988. Assay of lipids, glycogen and sugars in individual mosquitoes:  
805 correlations with wing length in field-collected *Aedes vexans*. *J. Am. Mosq. Control*  
806 *Assoc.* 4, 549–550.

- 807 Veenstra, J.A., 2021. Identification of cells expressing Calcitonins A and B, PDF and ACP in  
808 *Locusta migratoria* using cross-reacting antisera and *in situ* hybridization. *Peptides* 146,  
809 170667. <https://doi.org/10.1016/j.peptides.2021.170667>
- 810 Veenstra, J.A., 1989. Isolation and structure of corazonin, a cardioactive peptide from the  
811 American cockroach. *FEBS Lett.* 250, 231–234. [https://doi.org/10.1016/0014-5793\(89\)80727-6](https://doi.org/10.1016/0014-5793(89)80727-6)
- 812
- 813 Veenstra, J.A., Davis, N.T., 1993. Localization of corazonin in the nervous system of the  
814 cockroach *Periplaneta americana*. *Cell Tissue Res.* <https://doi.org/10.1007/BF00327985>
- 815 Wahedi, A., Paluzzi, J.-P., 2018. Molecular identification, transcript expression, and functional  
816 deorphanization of the adipokinetic hormone/corazonin-related peptide receptor in the  
817 disease vector, *Aedes aegypti*. *Sci. Rep.* 8, 2146. <https://doi.org/10.1038/s41598-018-20517-8>
- 818
- 819 Wat, L.W., Chao, C., Bartlett, R., Buchanan, J.L., Millington, J.W., Chih, H.J., Chowdhury, Z.S.,  
820 Biswas, P., Huang, V., Shin, L.J., Wang, L.C., Gauthier, M.-P.L., Barone, M.C.,  
821 Montooth, K.L., Welte, M.A., Rideout, E.J., 2020. A role for triglyceride lipase brummer  
822 in the regulation of sex differences in *Drosophila* fat storage and breakdown. *PLoS Biol.*  
823 18, e3000595. <https://doi.org/10.1371/journal.pbio.3000595>
- 824 Wat, L.W., Chowdhury, Z.S., Millington, J.W., Biswas, P., Rideout, E.J., 2021. Sex  
825 determination gene transformer regulates the male-female difference in *Drosophila* fat  
826 storage via the adipokinetic hormone pathway. *eLife* 10, e72350.  
827 <https://doi.org/10.7554/eLife.72350>
- 828 Weeda, E., Koopmanschap, A.B., de Kort, C.A.D., Beenackers, A.M.T., 1980. Proline synthesis  
829 in fat body of *Leptinotarsa decemlineata*. *Insect Biochem.* 10, 631–636.  
830 [https://doi.org/10.1016/0020-1790\(80\)90052-9](https://doi.org/10.1016/0020-1790(80)90052-9)
- 831 Zandawala, M., Haddad, A.S., Hamoudi, Z., Orchard, I., 2015. Identification and  
832 characterization of the adipokinetic hormone/corazonin-related peptide signaling system  
833 in *Rhodnius prolixus*. *FEBS J.* 282, 3603–3617. <https://doi.org/10.1111/febs.13366>
- 834 Zandawala, M., Nguyen, T., Balanyà Segura, M., Johard, H.A.D., Amcoff, M., Wegener, C.,  
835 Paluzzi, J.-P., Nässel, D.R., 2021. A neuroendocrine pathway modulating osmotic stress  
836 in *Drosophila*. *PLoS Genet.* 17, e1009425. <https://doi.org/10.1371/journal.pgen.1009425>
- 837 Zandawala, M., Tian, S., Elphick, M.R., 2018. The evolution and nomenclature of GnRH-type  
838 and corazonin-type neuropeptide signaling systems. *Gen. Comp. Endocrinol.* 264, 64–77.  
839 <https://doi.org/10.1016/j.ygcen.2017.06.007>
- 840 Zhou, Y.J., Fukumura, K., Nagata, S., 2018. Effects of adipokinetic hormone and its related  
841 peptide on maintaining hemolymph carbohydrate and lipid levels in the two-spotted  
842 cricket, *Gryllus bimaculatus*. *Biosci. Biotechnol. Biochem.* 82:2, 274-284, doi:  
843 10.1080/09168451.2017.1422106.
- 844 Ziegler, R., Eckart, K., Law, J.H., 1990. Adipokinetic hormone controls lipid metabolism in  
845 adults and carbohydrate metabolism in larvae of *Manduca sexta*. *Peptides* 11, 1037–1040.  
846 [https://doi.org/10.1016/0196-9781\(90\)90030-9](https://doi.org/10.1016/0196-9781(90)90030-9)
- 847

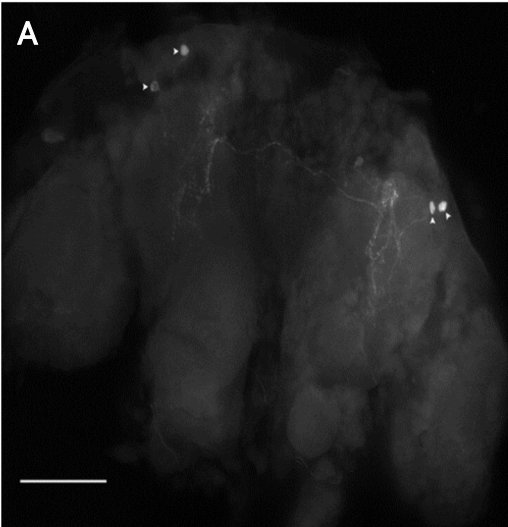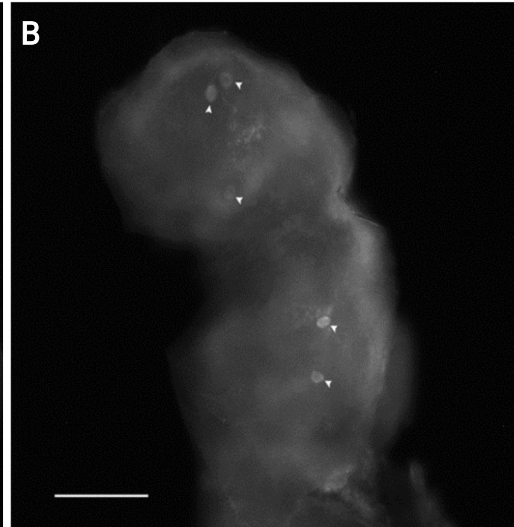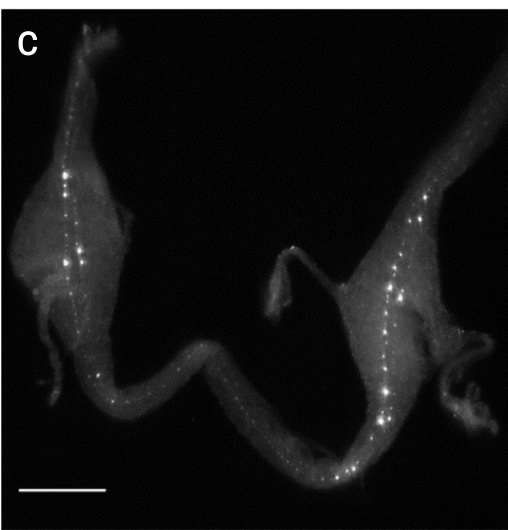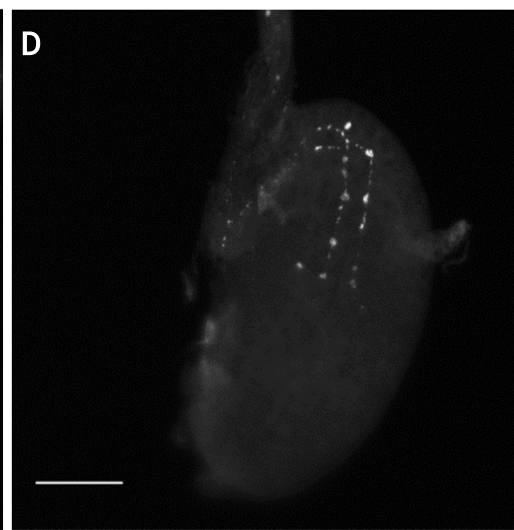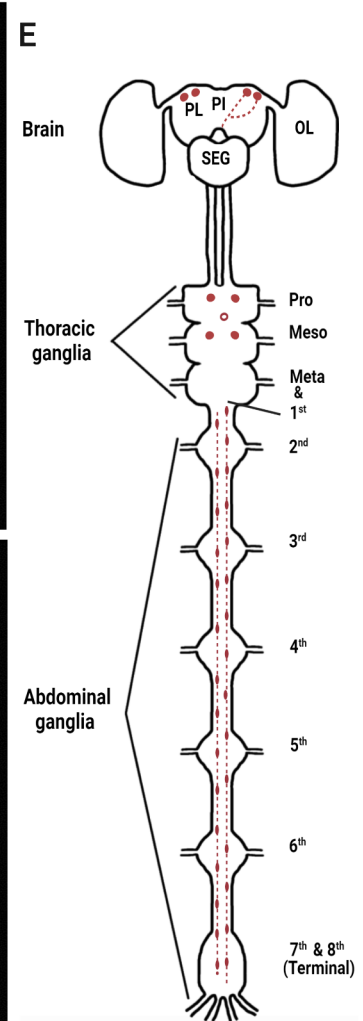



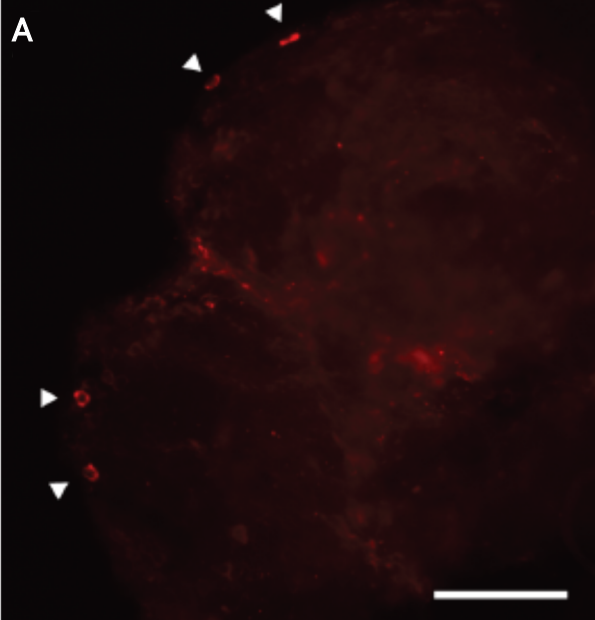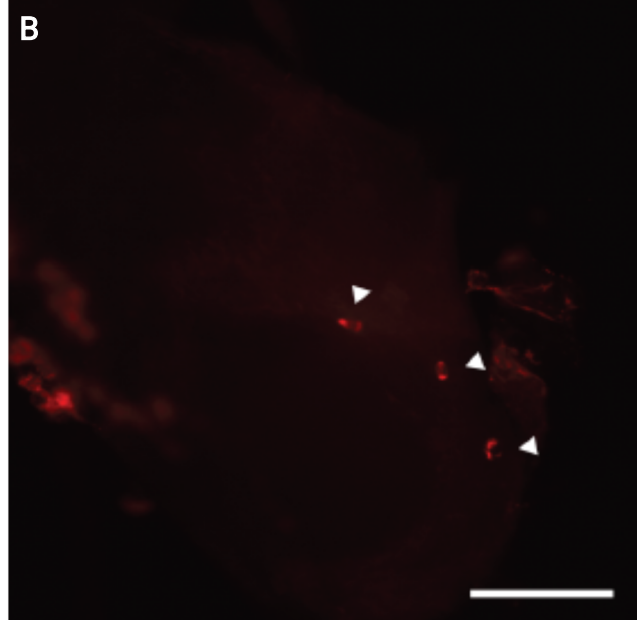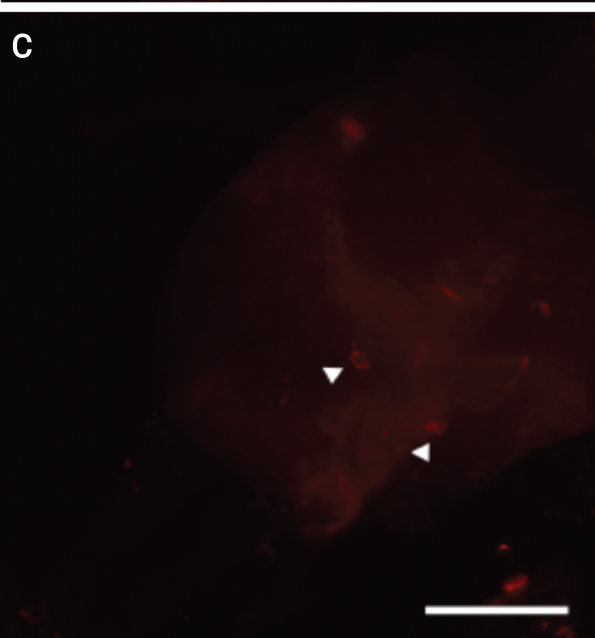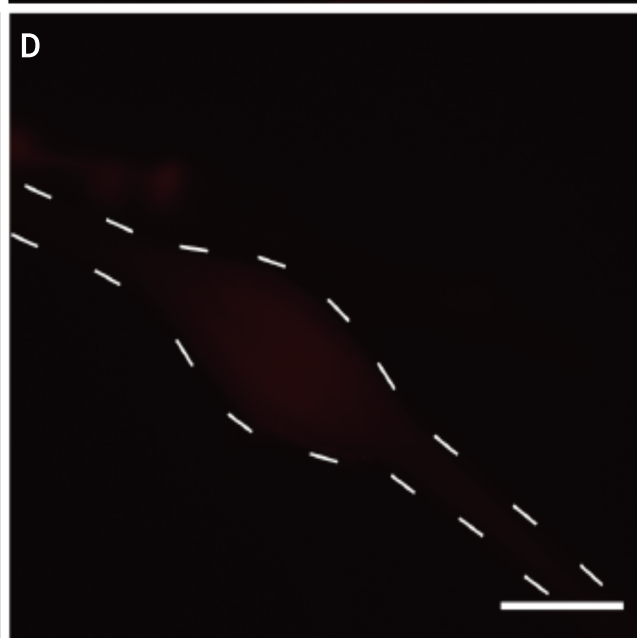

**A**

Relative Transcript Levels

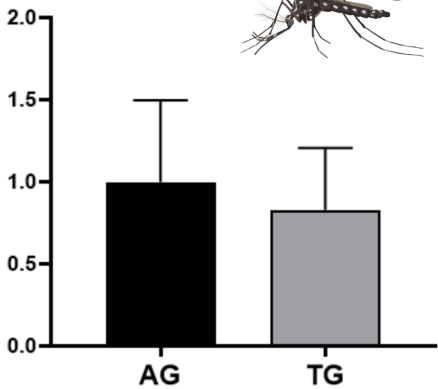**B**

Relative Transcript Levels

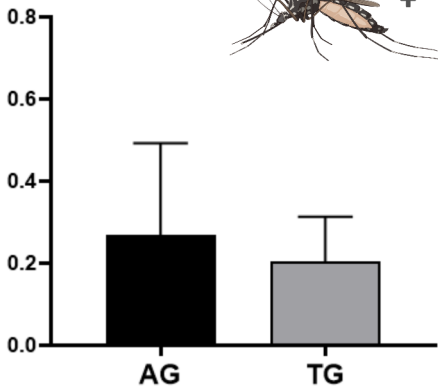

**A**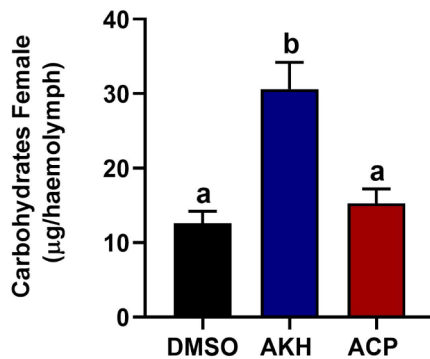**B**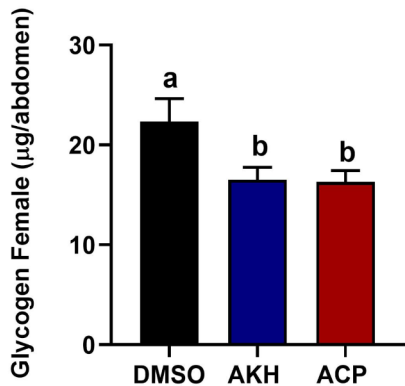**C**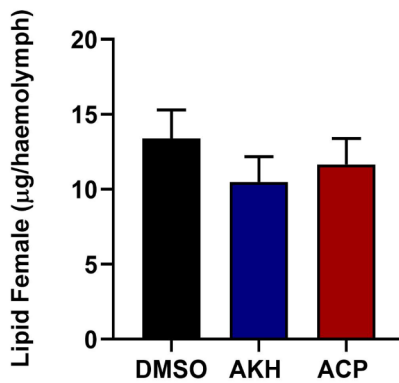**D**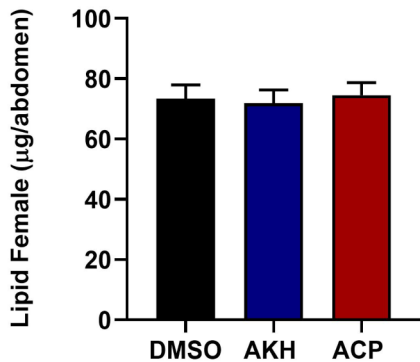

**A**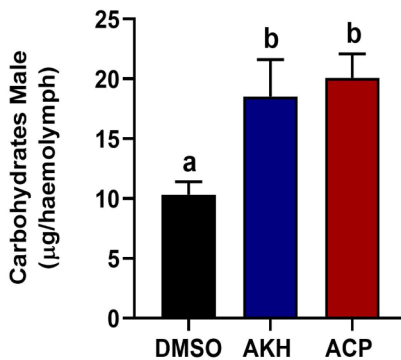**B**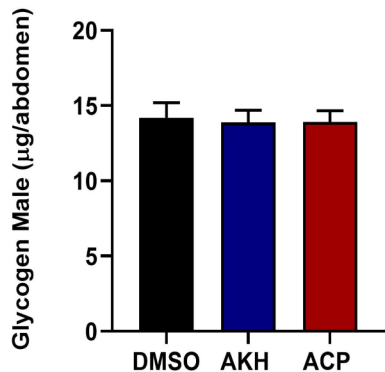**C**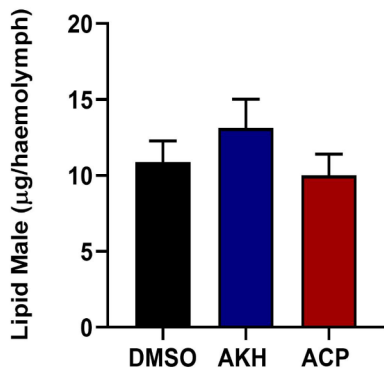**D**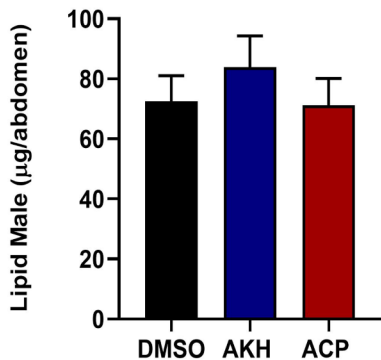

Source: http://biorxiv.org/content/10.1101/2022.07.01.498442v1.full.pdf
